# Supplementary material for: miR-200 Enhances Mouse Breast Cancer Cell Colonization to Form Distant Metastases
Source: PLoS One. 2009 Sep 29;4(9):e7181. doi: 10.1371/journal.pone.0007181 (PMC2749331; doi:10.1371/journal.pone.0007181)
Supplement: Table S1 — miRNA expression profile of the mouse mammary tumor cell lines based on miRNA microarray analysis. miRNAs reporter names are referred to by their names in miRbase v9.0. Two biological samples for each tumor cell lines were used and two independent hybridizations (Trial 1 and Trial 2) were performed. The dynamic range for the microarray platform is over 5 logs. Background level is around 30 (arbitrary units) and averaged signal shown here is background subtracted and normalized. Detailed data analysis is described in the Materials and Methods Section. For miRNA candidate selection, averaged signal below 500 is considered as not detected. (0.12 MB XLS) [file pone.0007181.s003.xls]

## Sheet: Simple Normalized Data
		67NR		168FARN		4TO7		4T1
		Trial 1	Trial 2	Trial 1	Trial 2	Trial 1	Trial 2	Trial 1	Trial 2
No.	Reporter Name	Averaged Signal	Averaged Signal	Averaged Signal	Averaged Signal	Averaged Signal	Averaged Signal	Averaged Signal	Averaged Signal
1	mmu-let-7a	32944.6	34926.2	35740.7	41578.8	35436	34409.7	40268.1	31483.3
2	mmu-let-7b	27411.4	26451.4	28463.3	30411.2	28622.7	27769.5	28151.6	20342.9
3	mmu-let-7c	29193.8	29877	30669.4	33813.7	30138.5	30656.5	31607.9	24544.9
4	mmu-let-7d	25046.5	21212.5	25907	29928.8	28879.6	24963.2	30275.2	22522.3
5	mmu-let-7d*	1500.32	1192.24	638.201	1687.33	1704.42	1358.23	957.599	394.871
6	mmu-let-7e	20296.1	15590.6	20878.8	24027.9	22911.3	17432.2	23082.8	15823
7	mmu-let-7f	25740.7	22061.3	27403.5	30009.1	29534.5	25767.3	33769.5	22665.3
8	mmu-let-7g	14491.2	9684.15	12622.9	14482.6	16217.7	13673.1	21734.7	14446.6
9	mmu-let-7i	23635.4	24831.3	19093.5	22256.5	14545.9	15927.5	23149.1	20402
10	mmu-miR-1	1	1	1	1	39.0588	1	1	1
11	mmu-miR-100	5906.14	4584.35	1163.03	1233.31	4441.91	4035.61	1575.43	2963.99
12	mmu-miR-101a	14.4133	30.5643	26.5003	38.3412	52.5204	25.6685	36.5844	78.6419
13	mmu-miR-101b	87.0962	349.732	154.759	231.756	202.69	253.193	271.496	732.437
14	mmu-miR-103	3725.05	4341.28	2768.29	1940.24	2710.51	3028.58	1265.24	2783.37
15	mmu-miR-106a	300.607	367.634	1655.17	1193.75	2720.07	2736.71	2422.3	4594.91
16	mmu-miR-106b	2131.16	2098.23	2452.55	1588.3	2250.17	2652.21	1389.05	2905.16
17	mmu-miR-107	3351.94	3910.2	2486.8	1744.05	2503.43	2668.64	1175.54	2425.71
18	mmu-miR-10a	45.0301	52.1921	74.9887	369.562	1	1	1	1
19	mmu-miR-10b	1	1	1	1	1	1	180.342	57.3725
20	mmu-miR-122a	1	128.984	1	975.837	1	1	1	1
21	mmu-miR-124a	116.005	1	16.1222	1	1	1	14.0664	1
22	mmu-miR-125a	19040.8	25066.4	24675.9	28718.6	19615.9	20096.7	15747.5	18875.8
23	mmu-miR-125b	33287.7	56095.4	27872.5	33297.3	29966.6	31122.4	35170.9	44482
24	mmu-miR-126-3p	26.3686	1	1	14.7306	242.458	48.9946	53.9379	27.9819
25	mmu-miR-126-5p	1	1	1	1	1	1	1	1
26	mmu-miR-127	100.637	1	1	1	1	1	1	1
27	mmu-miR-128a	61.9401	99.0636	106.74	195.449	182.755	166.065	94.4032	112.787
28	mmu-miR-128b	116.424	77.3362	86.0634	188.427	165.581	155.181	89.7198	107.171
29	mmu-miR-129-3p	29.5773	219.119	18.9105	1	1	1	1	1
30	mmu-miR-129-5p	44.3886	1	22.8704	1	1	1	1	1
31	mmu-miR-130a	1219.03	2055.7	1916.43	1586.8	1595.55	2128.53	1299.42	1883.93
32	mmu-miR-130b	222.142	746.653	94.6104	34.2781	332.798	500.787	26.3052	30.6752
33	mmu-miR-132	60.6517	163.183	1	25.7009	620.374	509.95	464.308	376.792
34	mmu-miR-133a	5.97715	1	21.1554	1	20.235	1	1	1
35	mmu-miR-133a*	1	1	1	1	1	1	1	1
36	mmu-miR-133b	4.43075	1	16.1712	1	19.5812	1	1	1
37	mmu-miR-134	1	17.7024	45.4972	55.7879	13.199	1	28.4226	1
38	mmu-miR-135a	1	1	1	1	1	1	1	1
39	mmu-miR-135b	1	1	1	1	1	1	1	1
40	mmu-miR-136	1	1	1	1	1	1	1	1
41	mmu-miR-137	1	1	1	1	1	1	1	1
42	mmu-miR-138	13.2488	1	1	1	1	1	1	1
43	mmu-miR-139	270.88	104.34	1	27.2477	1	1	9.76561	1
44	mmu-miR-140	22.2244	51.3629	1	30.0298	28.1315	21.6666	14.5201	1
45	mmu-miR-140*	1319.81	2594.26	374.297	431.004	368.989	687.735	177.419	315.45
46	mmu-miR-141	1	1	1	1	1	13.4158	45.5247	76.6167
47	mmu-miR-142-3p	1	1	1	1	1	1	8.33119	1
48	mmu-miR-142-5p	65.274	1	1	35.9213	13.8892	1	1	1
49	mmu-miR-143	198.747	558.986	557.523	582.045	31.7975	1	10.795	1
50	mmu-miR-144	1	1	1	1	1	1	1	1
51	mmu-miR-145	399.773	1254.91	765.557	914.43	25.8946	1	10.8424	1
52	mmu-miR-146	152.221	272.731	49.3596	170.3	69.7897	44.5515	2234.78	2270.24
53	mmu-miR-146b	102.107	99.2855	55.1031	131.994	649.919	986.464	202.321	75.8199
54	mmu-miR-148a	1	1	1	1	733.299	875.11	90.2068	94.4267
55	mmu-miR-148b	116.13	126.166	141.728	231.858	216.305	155.248	97.3697	111.341
56	mmu-miR-149	2525.91	1840.51	1285.51	1249.91	1025.18	1416.22	92.5245	519.071
57	mmu-miR-150	8.63822	26.0248	1	52.2326	29.9414	33.2353	1	1
58	mmu-miR-151	1759.28	1555.46	818.782	1073.93	1063.98	1381.18	727.99	1043.1
59	mmu-miR-152	1	1	64.302	227.465	400.579	375.949	26.1431	1
60	mmu-miR-153	14.114	1	1	1	1	1	1	1
61	mmu-miR-154	29.4847	1	1	1	1	1	1	1
62	mmu-miR-155	2698.49	1616.56	193.867	439.442	159.426	224.267	6380.38	3812.02
63	mmu-miR-15a	908.163	623.579	945.262	576.78	997.641	884.036	828.373	872.24
64	mmu-miR-15b	16018.2	15282.3	9374.69	11039.5	16277.8	15555	18820.1	15961.5
65	mmu-miR-16	16655.3	20771.5	10044.2	10282.1	3247.41	4924.35	6464.68	12534.7
66	mmu-miR-17-3p	5.8238	32.0868	41.7397	34.5802	69.1957	112.33	65.9821	104.846
67	mmu-miR-17-5p	1458.27	1642.54	4117.14	4131.71	7128.28	9147.87	9480.24	15611.3
68	mmu-miR-18	24.8806	128.554	191.996	137.435	349.41	629.757	330.358	1331.78
69	mmu-miR-181a	266.512	1078.32	507.593	443.896	157.086	163.477	372.914	357.323
70	mmu-miR-181a*	135.663	1	1	11.51	1	1	1	1
71	mmu-miR-181b	2001.39	1636.11	1640.52	1759.85	727.032	832.438	1385.22	2233.76
72	mmu-miR-181c	16.6697	52.743	24.8008	46.0889	32.9694	1	32.5578	31.8513
73	mmu-miR-182	3536.92	1639.88	5814.16	4377.15	8034.8	7392.68	12772	6912.89
74	mmu-miR-183	1652.57	708.061	2796.29	2237.61	6745.88	5255.66	7133.54	4149.43
75	mmu-miR-184	9.63323	1	1	1	14.5053	1	13.3564	1
76	mmu-miR-185	866.745	1105.26	944.137	849.233	446.79	532.737	438.969	436.637
77	mmu-miR-186	72.5898	329.545	64.3807	100.022	55.7574	106.017	15.4523	145.133
78	mmu-miR-187	48.0836	67.3691	13.8778	16.2675	68.092	61.0938	35.1856	54.8673
79	mmu-miR-188	10.3329	32.7572	191.492	138.594	18.2051	75.2166	54.8891	101.831
80	mmu-miR-189	1	1	1	1	1	1	1	1
81	mmu-miR-190	1	10.7589	1	1	1	1	1	1
82	mmu-miR-191	7292.3	5623.19	3244.25	2983.11	4499.73	5048.06	2971.56	4478.96
83	mmu-miR-192	1	1	1	1	1	1	1	1
84	mmu-miR-193	23.7844	125.88	1	12.1559	21.8783	1	13.5167	1
85	mmu-miR-194	25.4681	92.2314	1	15.5158	44.5996	26.5334	121.111	22.8382
86	mmu-miR-195	499.849	296.654	3877.84	4376.83	476.227	364.795	338.039	104.275
87	mmu-miR-196a	1	1	1	1	1	1	1	1
88	mmu-miR-196b	1	1	1	1	26.5204	1	18.2873	1
89	mmu-miR-199a	159.739	45.9806	29.9671	63.9724	1	1	1	1
90	mmu-miR-199a*	44.9494	59.7706	333.552	1261.17	61.8648	1	1	1
91	mmu-miR-199b	176.899	1	1	23.2407	1	1	1	1
92	mmu-miR-19a	1	1	1	17.414	28.6885	25.7073	23.6597	332.916
93	mmu-miR-19b	126.85	513.063	799.493	687.486	1367.16	2236.84	1277.05	4672.84
94	mmu-miR-200a	1	1	1	1	1	1	331.352	208.36
95	mmu-miR-200b	27.9269	22.6651	1	1	24.5172	1	6434.69	4052.75
96	mmu-miR-200c	1	1	1	14.0878	28.4391	1	8222.91	5945.75
97	mmu-miR-201	1	1	1	1	1	1	1	1
98	mmu-miR-202	1	1	1	1	12.9727	1	1	1
99	mmu-miR-203	1	1	1	1	126.005	36.3926	119.182	55.3001
100	mmu-miR-204	32.5111	1	1	1	1	1	1	1
101	mmu-miR-205	1	1	1	1	239.407	308.307	1	1
102	mmu-miR-206	1847.56	1716.26	166.189	315.966	91.4751	1	251.425	200.329
103	mmu-miR-207	80.8293	1	42.3624	27.1008	11.0214	1	1	25.2532
104	mmu-miR-208	1	1	1	1	1	1	1	1
105	mmu-miR-20a	1528.66	1569.38	4018.59	4374.8	7402.77	9198.72	10149.6	16395.3
106	mmu-miR-20b	125.436	138.442	1149.85	1355.85	3075.31	3059.22	4208.1	7257.21
107	mmu-miR-21	34232.6	40659.3	30103.5	37880	29529.5	30124.8	54820	44877.3
108	mmu-miR-210	43.3523	225.076	81.8283	65.9316	71.4824	119.029	12.0107	20.5913
109	mmu-miR-211	154.365	1	1	1	1	1	1	1
110	mmu-miR-212	145.346	1	1	13.4783	148.104	153.747	81.4166	154.734
111	mmu-miR-214	16.0212	36.9822	97.5345	223.559	55.3399	39.9953	43.4984	31.5497
112	mmu-miR-215	36.7617	1	1	1	1	1	31.1976	1
113	mmu-miR-216a	1	1	1	1	1	1	1	1
114	mmu-miR-216b	1	1	1	1	1	1	1	1
115	mmu-miR-217	1	1	1	1	1	1	1	1
116	mmu-miR-218	9.11111	1	1	1	1	1	1	1
117	mmu-miR-219	1	1	1	1	1	1	1	1
118	mmu-miR-22	2295.86	5323.47	2302.08	1116.14	288.927	455.843	273.592	752.331
119	mmu-miR-221	23315.4	32946.8	7743.35	11352.3	7720.7	9795.44	2452.3	4320.51
120	mmu-miR-222	21729.3	28231.6	7783.49	11478.5	7174.2	10321.9	1824.34	5274.23
121	mmu-miR-223	13.5455	1	131.174	24.0154	16.5399	1	14.7319	29.4036
122	mmu-miR-224	435.913	655.979	1	1	1	1	1	1
123	mmu-miR-23a	24823.2	34681.3	20839.5	27185	18042.3	23319.1	18852.5	29466.4
124	mmu-miR-23b	23968.2	30411	20078.7	26184.1	17803.2	21600.8	18109.9	27971.6
125	mmu-miR-24	10511.9	11917.5	8459.43	7340.94	6005.47	8787.9	5067.54	11326.8
126	mmu-miR-25	9220.63	6876.43	8462.5	10581.5	13213.3	14052.5	12283.6	12635.8
127	mmu-miR-26a	18087.2	14565.4	19402.4	20608.1	18619.4	20038.6	15138.2	8661.97
128	mmu-miR-26b	6523.81	2509.34	5878.64	5928.34	9746.78	6858.12	9501.11	3978.25
129	mmu-miR-27a	10062.5	9215.63	6826.28	5744.12	4420.87	4680.63	8476.08	10651.5
130	mmu-miR-27b	8614.51	6891.22	6090.16	5267.29	4433.57	4259.29	8897.73	8638.02
131	mmu-miR-28	1092.63	1261.32	985.371	848.587	772.367	486.118	551.989	330.91
132	mmu-miR-290	352.963	224.108	933.406	447.836	1234.75	217.384	621.895	90.63
133	mmu-miR-291a-3p	163.561	1	1	1	1	1	1	1
134	mmu-miR-291a-5p	7.37712	1	1	1	1	1	1	1
135	mmu-miR-291b-3p	23.4756	1	1	1	1	1	1	1
136	mmu-miR-291b-5p	69.5267	1	31.6114	1	1	1	1	1
137	mmu-miR-292-3p	1	1	1	1	1	1	1	1
138	mmu-miR-292-5p	70.0043	24.5664	237.881	129.895	529.694	44.8196	162.032	33.0026
139	mmu-miR-293	1	1	1	1	1	1	1	1
140	mmu-miR-294	7.14947	1	1	1	1	1	1	1
141	mmu-miR-295	1	1	1	1	1	1	1	1
142	mmu-miR-296	35.6354	1	170.91	16.7216	1	1	1	44.9089
143	mmu-miR-297	1	1	1	1	1	1	1	1
144	mmu-miR-297b	1	1	1	1	1	1	1	1
145	mmu-miR-298	234.392	24.4489	156.33	66.6099	66.7873	27.2992	38.6504	27.7118
146	mmu-miR-299	7.81932	1	1	1	1	1	1	1
147	mmu-miR-29a	23043.9	32944.9	27841.5	35781.7	21469.8	23705.5	18565.2	24569.4
148	mmu-miR-29b	757.636	2366.32	1158.85	594.942	599.19	490.999	284.486	574.088
149	mmu-miR-29c	43.4261	58.8439	415.334	103.783	299.373	44.9587	107.579	28.234
150	mmu-miR-300	87.0535	1	1	1	1	1	1	1
151	mmu-miR-301	97.7369	355.239	75.8773	103.566	175.574	287.981	193.64	884.096
152	mmu-miR-301b	1	1	1	1	14.2513	1	1	1
153	mmu-miR-302	1	1	1	1	1	1	1	1
154	mmu-miR-302b	1	1	1	1	1	1	1	1
155	mmu-miR-302b*	6.27749	1	1	1	1	1	1	1
156	mmu-miR-302c	1	1	1	1	1	1	1	1
157	mmu-miR-302c*	11.2054	1	1	1	1	1	1	1
158	mmu-miR-302d	1	1	1	1	1	1	1	1
159	mmu-miR-30a-3p	131.743	121.204	169.639	413.741	240.209	213.09	215.965	256.78
160	mmu-miR-30a-5p	2582.09	2253.74	3386.46	2244	3318.89	2446.46	2177.47	2789.62
161	mmu-miR-30b	7653.26	5133.18	7090.22	6538.31	8365.38	7019.21	6372.91	6023.81
162	mmu-miR-30c	7895.89	4949.25	7867.27	6839.35	6308.66	5472.04	5019.3	6206.27
163	mmu-miR-30d	2990.76	2453.19	3180.1	2082.48	3504.04	2936.29	2038.06	2950.04
164	mmu-miR-30e	21.563	69.5094	91.8275	31.5171	61.2978	32.9372	29.4403	59.2887
165	mmu-miR-30e*	3.57956	1	1	19.5604	32.9394	13.2439	17.3389	1
166	mmu-miR-31	13497.6	20126.8	7599.07	6290.86	12045	14065.8	9823.44	14260.5
167	mmu-miR-32	37.6025	1	1	1	1	1	1	1
168	mmu-miR-320	3198.57	3111.89	2751.32	1826.64	6254.84	5874.37	5150.8	4516.25
169	mmu-miR-322	362.133	741.709	158.152	270.788	329.908	463.833	64.4705	84.4427
170	mmu-miR-323	11.0884	1	1	1	1	1	1	1
171	mmu-miR-324-3p	85.7493	199.637	160.799	154.351	142.318	244.936	47.295	92.2773
172	mmu-miR-324-5p	76.3285	429.012	149.129	152.432	157.005	308.64	63.6941	194.982
173	mmu-miR-325	1	1	1	1	1	1	1	1
174	mmu-miR-326	9.09656	1	1	1	1	1	1	1
175	mmu-miR-328	52.4681	115.234	35.7225	65.9649	171.63	135.85	20.5216	61.8669
176	mmu-miR-329	1	1	1	1	1	1	1	1
177	mmu-miR-33	1	1	1	1	1	1	1	1
178	mmu-miR-330	1	1	1	1	46.0287	42.8639	1	23.7555
179	mmu-miR-331	43.5217	370.279	51.4802	52.2885	79.3414	67.9882	43.0464	81.2825
180	mmu-miR-335	1	1	1	1	1	1	21.3189	1
181	mmu-miR-337	6.43035	1	1	1	1	1	1	1
182	mmu-miR-338	1	1	1	1	1	1	1	1
183	mmu-miR-339	1	1	16.8329	1	14.9963	1	1	1
184	mmu-miR-340	131.771	1	1	1	125.309	140.016	1	26.6564
185	mmu-miR-341	449.605	9061.4	1672.12	2246.78	1299.61	2371.35	4263.91	1866.68
186	mmu-miR-342	797.199	1008.16	512.004	1052.73	15.365	32.6468	39.5022	37.6465
187	mmu-miR-344	18.0085	1	14.5919	22.8243	1	1	1	1
188	mmu-miR-345	322.286	168.797	53.437	39.6428	60.9668	88.2077	23.7646	69.5339
189	mmu-miR-346	127.777	55.5246	90.8588	1293.76	47.9991	869.91	106.002	196.746
190	mmu-miR-34a	534.248	1410.73	291.42	155.31	21.3101	1	164.981	291.654
191	mmu-miR-34b	5.13787	31.9496	1	1	1	1	1	1
192	mmu-miR-34c	74.8157	195.153	13.436	16.9196	1	1	1	1
193	mmu-miR-350	2096.34	1510.73	2256.39	2072.9	1267.95	1052.08	1381.42	1509.37
194	mmu-miR-351	1673.85	2111.87	754.888	801.877	646.419	1847.31	103.682	465.653
195	mmu-miR-361	2021.7	1366.38	1960.83	1762.62	2835.12	2567.11	2251.06	1886.59
196	mmu-miR-362	8.89449	41.9098	1	21.8762	18.2486	1	16.4454	38.6233
197	mmu-miR-363	1	1	1	1	1	1	1	1
198	mmu-miR-365	3329.37	2326.27	1312.35	2065.92	1666.92	506.485	634.239	775.294
199	mmu-miR-367	1	1	1	1	1	1	1	1
200	mmu-miR-369-3p	1	1	1	1	1	1	1	1
201	mmu-miR-369-5p	1	1	1	1	1	1	1	1
202	mmu-miR-370	4.55636	1	64.6959	1	1	1	1	1
203	mmu-miR-374-3p	5.60208	1	1	1	1	1	1	1
204	mmu-miR-374-5p	890.24	470.095	62.3503	153.591	126.486	77.7502	267.917	85.1446
205	mmu-miR-375	1	1	1	1	1	1	1	1
206	mmu-miR-376a	23.7212	1	1	1	1	1	1	1
207	mmu-miR-376a*	1	1	1	1	1	1	1	1
208	mmu-miR-376b	6.39132	1	1	1	1	1	1	1
209	mmu-miR-376b*	1	1	1	1	1	1	1	1
210	mmu-miR-376c	1	1	1	1	1	1	1	1
211	mmu-miR-377	10.7199	302.668	52.5395	28.6193	53.0486	27.5419	129.158	40.0897
212	mmu-miR-378	23.1684	38.9353	15.701	44.8827	15.3153	20.9831	1	1
213	mmu-miR-379	1	1	1	1	1	1	1	1
214	mmu-miR-380-3p	6.04464	1	1	1	1	1	1	1
215	mmu-miR-380-5p	33.3399	1	1	1	1	1	1	1
216	mmu-miR-381	13.8394	1	1	1	1	1	1	1
217	mmu-miR-382	1	1	1	1	1	1	1	1
218	mmu-miR-383	16.2828	1	1	1	1	1	1	1
219	mmu-miR-384	1	1	1	1	1	1	1	1
220	mmu-miR-409	6.56493	1	41.0455	1	1	1	1	1
221	mmu-miR-410	1	1	1	1	1	1	1	1
222	mmu-miR-411	10.9386	1	1	1	1	1	1	1
223	mmu-miR-412	65.7844	1	1	1	1	1	1	1
224	mmu-miR-422b	316.968	886.359	590.693	672.506	168.653	209.378	83.3767	124.132
225	mmu-miR-423	11.5499	42.0161	60.1508	27.7863	21.4078	25.1614	1	30.1585
226	mmu-miR-424	4641.77	2271.2	1364.71	1364.79	1972.19	1979.74	254.106	269.228
227	mmu-miR-425	66.865	29.029	19.9573	14.9541	15.6092	1	1	1
228	mmu-miR-429	44.866	1	1	1	1	1	714.717	881.307
229	mmu-miR-431	14.9023	1	1	1	1	1	1	1
230	mmu-miR-433-3p	22.8548	1	1	1	1	1	1	1
231	mmu-miR-433-5p	32.1792	1	1	1	1	1	1	1
232	mmu-miR-434-3p	282.679	1	1	1	1	18.4409	1	1
233	mmu-miR-434-5p	64.0291	1	1	1	1	1	1	1
234	mmu-miR-448	1	1	1	1	1	1	1	1
235	mmu-miR-449	13.3164	30.3124	1	14.8035	36.5167	32.3561	1	1
236	mmu-miR-449b	1	1	1	8.06311	1	1	1	1
237	mmu-miR-450	419.122	261.979	62.4484	32.9596	408.168	147.478	19.9682	1
238	mmu-miR-450b	1	1	1	1	1	1	1	1
239	mmu-miR-450b*	30.1594	1	1	14.8489	46.5863	1	1	1
240	mmu-miR-451	1	1	1	1	1	1	1	1
241	mmu-miR-452	24.3379	1	17.733	12.1099	1	1	1	1
242	mmu-miR-455-3p	36.0473	46.7965	1	1	1	1	1	28.4591
243	mmu-miR-455-5p	6.43332	1	1	1	1	1	1	1
244	mmu-miR-463	1	1	1	9.39617	1	1	1	1
245	mmu-miR-464	1	1	1	1	1	1	1	1
246	mmu-miR-465	1	1	24.2421	83.4046	1	1	1	1
247	mmu-miR-466	25.2407	1	1	1	1992.73	1471.69	4677.07	1524.46
248	mmu-miR-467*	1	1	1	1	121.101	47.3496	196.827	121.472
249	mmu-miR-467a	461.545	27.2463	34.8928	54.1315	332.912	341.199	439.287	254.867
250	mmu-miR-467b	350.974	1	25.0154	93.1178	73.7913	62.9482	62.8188	27.2382
251	mmu-miR-468	1	1	1	31.435	1	1	1	1
252	mmu-miR-469	199.158	1	1	1	1	1	1	1
253	mmu-miR-470	13.0289	1	509.76	1097.79	15.9379	1	1	1
254	mmu-miR-471	1	1	1	52.469	1	1	1	1
255	mmu-miR-483	5.53981	1	77.3663	128.313	1	1	1	1
256	mmu-miR-484	401.922	1510.06	1254.35	670.84	480.14	874.388	149.596	603.219
257	mmu-miR-485-3p	127.056	1	37.722	19.9796	1	23.0956	10.8471	1
258	mmu-miR-485-5p	9.81897	1	1	1	1	1	1	1
259	mmu-miR-486	27.6249	56.8884	1	11.1228	22.3003	17.7788	22.0705	1
260	mmu-miR-487b	68.3254	1	1	1	1	1	1	1
261	mmu-miR-488	1	1	1	1	1	1	1	1
262	mmu-miR-488*	67.703	1	1	1	1	1	1	1
263	mmu-miR-489	48.9323	1	1	16.6151	1	1	13.3492	1
264	mmu-miR-490	1	1	1	1	1	1	1	1
265	mmu-miR-491	1	1	8.39366	1	1	1	1	1
266	mmu-miR-494	24.3368	1	25.722	1	1	1	1	1
267	mmu-miR-495	1	1	1	1	1	1	1	1
268	mmu-miR-496	90.2057	1	1	1	1	1	1	1
269	mmu-miR-497	1	1	25.6427	52.0003	1	1	1	1
270	mmu-miR-499	1	1	1	1	1	1	1	1
271	mmu-miR-500	7.16972	38.6635	28.2506	21.8975	19.6096	20.7987	27.7546	32.9169
272	mmu-miR-501	1	24.9988	1	14.0247	14.6486	1	1	1
273	mmu-miR-501*	15.3071	48.0964	34.3831	59.4543	64.7722	85.9125	87.6894	196.745
274	mmu-miR-503	154.249	376.552	78.5865	61.2272	45.7214	95.7588	24.894	61.1479
275	mmu-miR-505	1	1	1	1	1	1	1	1
276	mmu-miR-532	94.3249	351.125	100.053	173.987	128.655	192.83	158.614	333.278
277	mmu-miR-539	1	1	1	1	1	1	1	1
278	mmu-miR-540	1	1	1	1	1	1	1	1
279	mmu-miR-541	1	1	1	1	1	1	1	1
280	mmu-miR-542-3p	14.7278	1	1	1	22.5239	1	1	1
281	mmu-miR-542-5p	7.25131	1	1	1	1	1	1	1
282	mmu-miR-543	13.5907	1	1	1	1	1	1	1
283	mmu-miR-546	47.7082	1	45.823	15.1711	1	1	1	1
284	mmu-miR-547	1	1	1	1	1	1	1	1
285	mmu-miR-551b	1	1	1	1	1	1	1	1
286	mmu-miR-592	1	1	1	1	1	1	1	1
287	mmu-miR-615	1	1	1	16.6957	1	1	1	1
288	mmu-miR-652	103.297	266.116	133.273	118.163	378.349	629.315	139.848	332.011
289	mmu-miR-665	1	1	58.8831	33.7239	203.714	1	38.251	1
290	mmu-miR-666	53.0724	1	1	16.4507	1	1	1	1
291	mmu-miR-667	1	1	1	24.6177	1	1	1	1
292	mmu-miR-668	39.6397	1	30.4123	11.7876	1	1	1	1
293	mmu-miR-669a	1	1	1	1	798.568	543.349	849.644	1065.32
294	mmu-miR-669b	1	1	1	1	34.1039	16.8931	11.8906	28.1108
295	mmu-miR-669c	4.65372	1	1	18.0644	945.865	893.751	1342.92	711.924
296	mmu-miR-670	1	1	1	1	1	1	1	1
297	mmu-miR-671	1140.22	975.462	2694.05	3125.43	486.848	1548.32	1329.14	1005.78
298	mmu-miR-672	4.78322	1	1	23.9665	12.9954	17.5618	16.7417	1
299	mmu-miR-673	1	1	1	1	1	1	1	1
300	mmu-miR-674	777.17	1177.05	1762.41	1487.14	840.712	1013.05	276.804	335.963
301	mmu-miR-674*	285.529	568.02	360.833	637.401	461.478	639.646	109.612	213.394
302	mmu-miR-675-3p	7.62746	1	1	1	1	1	1	1
303	mmu-miR-675-5p	1	1	1	1	1	1	1	1
304	mmu-miR-676	1	1	25.1503	119.92	1	1	83.3456	128.178
305	mmu-miR-676*	100.083	1	1	19.2118	1	1	1	1
306	mmu-miR-677	1	1	1	1	1	1	1	1
307	mmu-miR-678	6.86331	1	33.8226	63.055	21.5721	31.9482	54.6056	1
308	mmu-miR-679	4.44139	1	1	1	1	1	1	1
309	mmu-miR-680	179.484	132.855	470.768	487.738	448.3	714.95	587.626	141.413
310	mmu-miR-681	11.1075	26.8796	1	33.9109	1	22.5716	1	26.3912
311	mmu-miR-682	1	1	1	1	1	1	1	1
312	mmu-miR-683	77.1985	1	1	1	1	1	1	1
313	mmu-miR-684	1	1	1	1	1	1	1	1
314	mmu-miR-685	66.2411	49.0139	175.918	234.228	124.487	69.4163	358.099	54.8813
315	mmu-miR-686	1	1	1	1	1	1	1	1
316	mmu-miR-687	1	1	1	1	1	1	1	1
317	mmu-miR-688	24.0745	1	1	1	1	1	1	1
318	mmu-miR-689	21236.6	18954.5	11733.3	13776.1	13571.8	8574.53	13440.9	6429.38
319	mmu-miR-690	3935.54	5319.71	22864.6	21106.6	13134.3	16065.4	15985.7	12728.6
320	mmu-miR-691	16.6767	46.8721	270.117	624.895	272.852	79.286	240.954	66.5232
321	mmu-miR-692	106.677	1	12.1061	11.4853	1	1	1	1
322	mmu-miR-693-3p	1	1	1	1	1	1	1	1
323	mmu-miR-693-5p	11.2972	1	1	1	1	1	1	1
324	mmu-miR-694	1	1	1	1	1	1	1	1
325	mmu-miR-695	1	1	1	1	1	1	1	1
326	mmu-miR-696	1	1	1	1	1	1	1	1
327	mmu-miR-697	1	1	1	1	1	1	1	1
328	mmu-miR-698	40.5148	1	1	29.1612	1	1	1	1
329	mmu-miR-699	113.494	63.0895	218.31	65.1729	104.521	231.462	160.417	198.259
330	mmu-miR-7	2903.54	1774.24	178.245	573.889	115.976	437.78	291.404	2009.34
331	mmu-miR-700	87.5845	47.6758	1	17.6963	48.4178	76.1407	22.7229	62.4885
332	mmu-miR-701	1	1	1	1	1	1	1	1
333	mmu-miR-702	50.5021	1	92.0432	28.0913	28.1492	21.8701	15.1581	40.9949
334	mmu-miR-703	1	1	1	17.7438	1	1	1	1
335	mmu-miR-704	10.5773	1	1	1	1	1	1	1
336	mmu-miR-705	2390.43	1493.63	7453.18	5700.39	4697.93	3093.23	6016.46	2521.81
337	mmu-miR-706	5.249	154.947	29.7215	85.8224	32.3828	1	90.8536	1
338	mmu-miR-707	72.6705	1	1	1	1	1	1	1
339	mmu-miR-708	1	1	1	1	1	1	12.0983	1
340	mmu-miR-709	28733.8	42237.7	54132.8	93401.4	36735.6	54561.5	45506.1	46529.9
341	mmu-miR-710	1	1	52.9546	47.1731	20.138	19.834	217.483	1
342	mmu-miR-711	1	1	68.2444	18.5474	36.9529	1	31.1353	1
343	mmu-miR-712	39.7168	1	48.3969	15.1353	13.4296	1	31.9937	24.5001
344	mmu-miR-712*	1	1	43.2173	1	1	1	1	1
345	mmu-miR-713	155.797	1	1	29.3791	31.2355	1	36.1307	1
346	mmu-miR-714	120.136	1	209.695	59.1084	103.161	26.898	450.159	104.837
347	mmu-miR-715	1	1	46.0323	1	1	1	1	1
348	mmu-miR-717	13.7655	1	1	1	1	1	1	1
349	mmu-miR-718	7.3586	1	1	1	1	1	1	1
350	mmu-miR-719	1	1	1	1	1	1	1	1
351	mmu-miR-720	1146.85	1114.45	2145.52	1048.9	1481.29	1460.2	865.315	728.415
352	mmu-miR-721	14.9965	1	164.951	159.314	22.2379	38.8683	51.2926	43.7966
353	mmu-miR-744	610.699	812.107	1382.38	480.812	1278.18	565.981	1682.64	327.689
354	mmu-miR-758	1	1	1	1	1	1	1	1
355	mmu-miR-759	22.2979	1	1	1	1	1	1	1
356	mmu-miR-760	19.6785	42.6949	163.271	195.898	67.0682	144.338	159.388	49.9279
357	mmu-miR-761	1	1	1	1	1	1	1	1
358	mmu-miR-762	4051.51	3065.85	9977.54	5782.78	11032.3	3456.65	12977	2341.46
359	mmu-miR-763	143.322	1	30.3057	24.8756	21.6377	21.9287	25.8698	1
360	mmu-miR-764-3p	1	1	1	1	1	1	1	1
361	mmu-miR-764-5p	34.075	1	1	1	1	1	1	1
362	mmu-miR-770-3p	6.62066	1	42.7811	22.1654	1	1	19.8462	1
363	mmu-miR-7b	1	1	1	1	1	1	1	1
364	mmu-miR-801	47.6157	61.7799	102.955	43.8593	44.0489	87.3664	79.094	101.523
365	mmu-miR-802	1	1	1	1	1	1	1	1
366	mmu-miR-804	1	1	1	1	1	1	1	1
367	mmu-miR-805	1350.13	1125.41	3346.03	2799.86	2451.54	4174.45	1810.58	2682.58
368	mmu-miR-9	1	1	73.925	67.5115	1078.25	288.64	1468.11	309.928
369	mmu-miR-9*	27.8613	1	52.5077	134.039	527.863	554.866	707.691	375.505
370	mmu-miR-92	2564.37	1959.72	6240.6	6437.64	12358.7	12471.5	13347.9	16679.9
371	mmu-miR-93	3409.43	3436.64	3681.39	2477.44	3367.34	4207.72	1968.05	3828.14
372	mmu-miR-96	15.8181	1	108.093	45.138	148.487	82.0178	47.4273	106.041
373	mmu-miR-98	3946.95	837.716	5938	4672.54	12742	2845.16	6945.52	1309.97
374	mmu-miR-99a	456.784	558.58	557.083	520.115	2828.25	2424.24	393.384	632.686
375	mmu-miR-99b	12745.8	17529	14599.3	16042.3	8565.66	11194.5	4754.69	11544.7
